# Supplementary material for: Effect of aerosol particles generated by ultrasonic humidifiers on the lung in mouse
Source: PubMed Central journal article supplement (PMC3922954; doi:10.1186/1743-8977-10-64), 2013-12-21
Supplement: 1743-8977-10-64-S1.pdf [file 1743-8977-10-64-S1.pdf]

**Supplementary Table S1 – Primer and probe sequences for quantitative RT-PCR**

| Gene                       | Sequence (5' -> 3')                                                                  | Tm (°C) |
|----------------------------|--------------------------------------------------------------------------------------|---------|
| <i>Ccl2</i> (NM_011333.3)  | F: GCTGGAGCATCCACGTGTT<br>R: TGGTGAATGAGTAGCAGCAGGT<br>P: CTCAGCCAGATGCAGTTAACGCCCC  | 60      |
| <i>Cxcl1</i> (NM_008176.3) | F: ACCGAAGTCATAGCCCACTC<br>R: CTCCGTTACTTGGGGACACC                                   | 60      |
| <i>Gapdh</i> (NM_008084.2) | F: <i>TGTGCAGTGCCAGCCTCGTC</i><br>R: GGATGCATTGCTGACAATCT                            | 60      |
| <i>Tnf</i> (NM_013693.2)   | F: GAACTTCGGGGTGATCGGT<br>R: GTGAGGGTCTGGGCCATAGA<br>P: CAAAGGGATGAGAAGTTCCCAAATGGCC | 60      |

**Supplementary Figure S1 – Profile of gene expression in the lung exposed to aerosol released from ultrasonic humidifier with tap water, high-silica water, or ultrapure water**

Experiment # 3 2 1 4 5 3 2 1 4 5  
 Water Ultrapure T S T S S

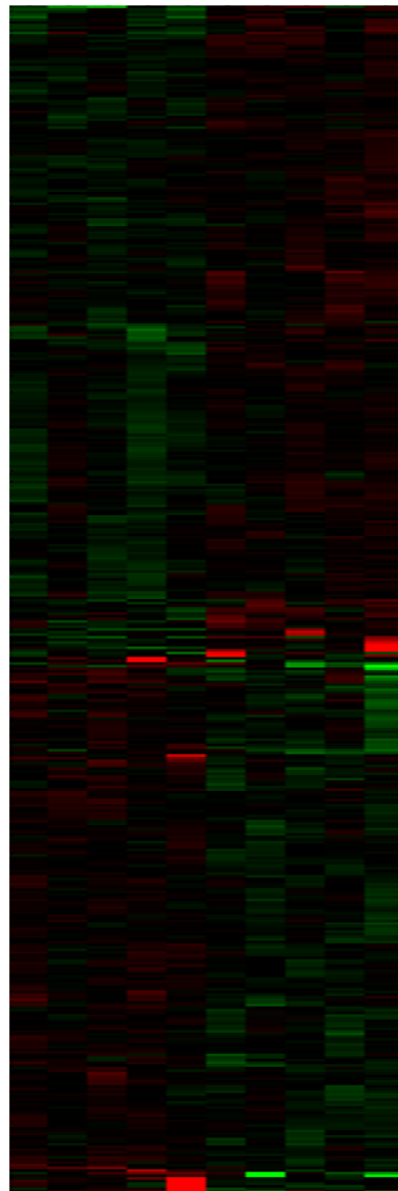

**Upregulated genes**

Enriched in mitosis, meiosis and related categories

**Differentially expressed genes**

Enriched in major histocompatibility complex (MHC) molecules, endocytosis, antigen processing, and cell adhesion molecules.

Among 15984 mRNAs with quantitative fluorescence signal (raw data  $\geq 100$ ), the data for genes with small variations among the ultrapure water groups are sorted into hierarchical clustering. “S” and “T” indicate high-silica water and tap water, respectively. The details of each experiment number were shown in Table 1.

Supplementary Table S2 – Differentially expressed genes with relevant enriched GO and pathways

| Gene Symbol | antigen processing and presentation of peptide or polysaccharide antigen via MHC class II | MHC class II protein complex | antigen processing and presentation of exogenous peptide antigen via MHC class II | KEGG_ASTHMA | KEGG_TYPE_I_DIABETES_MELLITUS | KEGG_ALLOGRAFT_REJECTION | KEGG_AUTOIMMUNE_THYROID_DISEASE | KEGG_GRAFT_VERSUS_HOST_DISEASE | KEGG_ANTIGEN_PROCESSING_AND_PRESENTATION | KEGG_VIRAL_MYOCARDITIS | peptide antigen binding | KEGG_CELL_ADHESION_MOLECULES_CAMS | regulation of axonogenesis | platelet activation | gamma-aminobutyric acid signaling pathway | adenylate cyclase-activating G-protein coupled receptor signaling pathway | ST_GA13_PATHWAY | meiosis | PID_PLK1_PATHWAY | mitosis | chromosome, centromeric region | kinetochore | chromosome segregation | REACTOME_MITOTIC_PROMETAPHASE | MIPS_CENP_A_NAC_CAD_COMPLEX | decidualization | motile cilium | retinol metabolic process | axon part |
|-------------|-------------------------------------------------------------------------------------------|------------------------------|-----------------------------------------------------------------------------------|-------------|-------------------------------|--------------------------|---------------------------------|--------------------------------|------------------------------------------|------------------------|-------------------------|-----------------------------------|----------------------------|---------------------|-------------------------------------------|---------------------------------------------------------------------------|-----------------|---------|------------------|---------|--------------------------------|-------------|------------------------|-------------------------------|-----------------------------|-----------------|---------------|---------------------------|-----------|
| H2-DMb1     | +                                                                                         | +                            | +                                                                                 | +           | +                             | +                        | +                               | +                              | +                                        | +                      | +                       | +                                 |                            |                     |                                           |                                                                           |                 |         |                  |         |                                |             |                        |                               |                             |                 |               |                           |           |
| H2-Ab1      | +                                                                                         | +                            | +                                                                                 | +           | +                             | +                        | +                               | +                              | +                                        | +                      | +                       | +                                 |                            |                     |                                           |                                                                           |                 |         |                  |         |                                |             |                        |                               |                             |                 |               |                           |           |
| H2-Eb1      | +                                                                                         | +                            | +                                                                                 | +           | +                             | +                        | +                               | +                              | +                                        | +                      | +                       | +                                 |                            |                     |                                           |                                                                           |                 |         |                  |         |                                |             |                        |                               |                             |                 |               |                           |           |
| H2-Q2       |                                                                                           |                              |                                                                                   |             | +                             | +                        | +                               | +                              | +                                        | +                      | +                       | +                                 |                            |                     |                                           |                                                                           |                 |         |                  |         |                                |             |                        |                               |                             |                 |               |                           |           |
| Tap1        |                                                                                           |                              |                                                                                   |             |                               |                          |                                 |                                | +                                        |                        | +                       |                                   |                            |                     |                                           |                                                                           |                 |         |                  |         |                                |             |                        |                               |                             |                 |               |                           |           |
| Dmd         |                                                                                           |                              |                                                                                   |             |                               |                          |                                 |                                |                                          | +                      |                         |                                   |                            |                     |                                           |                                                                           |                 |         |                  |         |                                |             |                        |                               |                             |                 |               |                           |           |
| Sgcb        |                                                                                           |                              |                                                                                   |             |                               |                          |                                 |                                |                                          | +                      |                         |                                   |                            |                     |                                           |                                                                           |                 |         |                  |         |                                |             |                        |                               |                             |                 |               |                           |           |
| Cacna1a     |                                                                                           |                              |                                                                                   |             |                               |                          |                                 |                                |                                          |                        |                         |                                   | +                          |                     | +                                         |                                                                           |                 |         |                  |         |                                |             |                        |                               |                             |                 |               |                           |           |
| Cdh2        |                                                                                           |                              |                                                                                   |             |                               |                          |                                 |                                |                                          |                        |                         | +                                 |                            |                     |                                           |                                                                           |                 |         |                  |         |                                |             |                        |                               |                             |                 |               |                           |           |
| Ssh1        |                                                                                           |                              |                                                                                   |             |                               |                          |                                 |                                |                                          |                        |                         | +                                 |                            |                     |                                           |                                                                           |                 |         |                  |         |                                |             |                        |                               |                             |                 |               |                           |           |
| Cntnap2     |                                                                                           |                              |                                                                                   |             |                               |                          |                                 |                                |                                          |                        |                         | +                                 |                            |                     |                                           |                                                                           |                 |         |                  |         |                                |             |                        |                               |                             |                 |               |                           |           |
| Selplg      |                                                                                           |                              |                                                                                   |             |                               |                          |                                 |                                |                                          |                        |                         | +                                 |                            |                     |                                           |                                                                           |                 |         |                  |         |                                |             |                        |                               |                             |                 |               |                           |           |
| Cdh4        |                                                                                           |                              |                                                                                   |             |                               |                          |                                 |                                |                                          |                        |                         | +                                 |                            |                     |                                           |                                                                           |                 |         |                  |         |                                |             |                        |                               |                             |                 |               |                           |           |
| Itgb3       |                                                                                           |                              |                                                                                   |             |                               |                          |                                 |                                |                                          |                        |                         |                                   |                            | +                   |                                           |                                                                           |                 |         |                  |         |                                |             |                        |                               |                             |                 |               |                           |           |
| Wnt3a       |                                                                                           |                              |                                                                                   |             |                               |                          |                                 |                                |                                          | +                      |                         |                                   |                            | +                   |                                           |                                                                           |                 |         |                  |         |                                |             |                        |                               |                             |                 |               |                           |           |
| Fhad1       |                                                                                           |                              |                                                                                   |             |                               |                          |                                 |                                |                                          |                        |                         |                                   |                            | +                   |                                           |                                                                           |                 |         |                  |         |                                |             |                        |                               |                             |                 |               |                           |           |
| Htr4        |                                                                                           |                              |                                                                                   |             |                               |                          |                                 |                                |                                          |                        |                         |                                   |                            |                     | +                                         | +                                                                         |                 |         |                  |         |                                |             |                        |                               |                             |                 |               |                           |           |
| Gabra3      |                                                                                           |                              |                                                                                   |             |                               |                          |                                 |                                |                                          |                        |                         |                                   |                            |                     | +                                         |                                                                           |                 |         |                  |         |                                |             |                        |                               |                             |                 |               |                           |           |
| Gna13       |                                                                                           |                              |                                                                                   |             |                               |                          |                                 |                                |                                          |                        |                         |                                   |                            | +                   |                                           | +                                                                         |                 |         |                  |         |                                |             |                        |                               |                             |                 |               |                           |           |
| Rock2       |                                                                                           |                              |                                                                                   |             |                               |                          |                                 |                                |                                          |                        |                         |                                   |                            |                     |                                           |                                                                           | +               |         |                  |         |                                |             |                        |                               |                             |                 |               |                           |           |
| Cfb         |                                                                                           |                              |                                                                                   |             |                               |                          |                                 |                                |                                          |                        |                         |                                   |                            |                     |                                           |                                                                           | +               |         |                  |         |                                |             |                        |                               |                             |                 |               |                           |           |
| Tbxa2r      |                                                                                           |                              |                                                                                   |             |                               |                          |                                 |                                |                                          |                        |                         |                                   |                            |                     |                                           |                                                                           | +               |         |                  |         |                                |             |                        |                               |                             |                 |               |                           |           |
| Adora2a     |                                                                                           |                              |                                                                                   |             |                               |                          |                                 |                                |                                          |                        |                         |                                   |                            |                     |                                           | +                                                                         |                 |         |                  |         |                                |             |                        |                               |                             |                 |               |                           |           |
| Glp1r       |                                                                                           |                              |                                                                                   |             |                               |                          |                                 |                                |                                          |                        |                         |                                   |                            |                     |                                           | +                                                                         |                 |         |                  |         |                                |             |                        |                               |                             |                 |               |                           |           |
| Mnd1        |                                                                                           |                              |                                                                                   |             |                               |                          |                                 |                                |                                          |                        |                         |                                   |                            |                     |                                           |                                                                           |                 | +       |                  |         |                                |             |                        |                               |                             |                 |               |                           |           |
| Meig1       |                                                                                           |                              |                                                                                   |             |                               |                          |                                 |                                |                                          |                        |                         |                                   |                            |                     |                                           |                                                                           |                 |         | +                |         |                                |             |                        |                               |                             |                 |               |                           |           |
| Ccna1       |                                                                                           |                              |                                                                                   |             |                               |                          |                                 |                                |                                          |                        |                         |                                   |                            |                     |                                           |                                                                           |                 |         |                  | +       |                                |             |                        |                               |                             |                 |               |                           |           |
| Cdk1        |                                                                                           |                              |                                                                                   |             |                               |                          |                                 |                                |                                          |                        |                         |                                   |                            |                     |                                           |                                                                           |                 |         |                  | +       |                                |             |                        |                               |                             |                 |               |                           |           |
| Cdk2        |                                                                                           |                              |                                                                                   |             |                               |                          |                                 |                                |                                          |                        |                         |                                   |                            |                     |                                           |                                                                           |                 |         |                  | +       |                                |             |                        |                               |                             |                 |               |                           |           |
| Nek2        |                                                                                           |                              |                                                                                   |             |                               |                          |                                 |                                |                                          |                        |                         |                                   |                            |                     |                                           |                                                                           |                 |         |                  | +       |                                |             |                        |                               |                             |                 |               |                           |           |
| Rad51       |                                                                                           |                              |                                                                                   |             |                               |                          |                                 |                                |                                          |                        |                         |                                   |                            |                     |                                           |                                                                           |                 |         |                  | +       |                                |             |                        |                               |                             |                 |               |                           |           |
| Aurka       |                                                                                           |                              |                                                                                   |             |                               |                          |                                 |                                |                                          |                        |                         |                                   |                            |                     |                                           |                                                                           |                 |         |                  |         | +                              |             |                        |                               |                             |                 |               |                           |           |
| Cenph       |                                                                                           |                              |                                                                                   |             |                               |                          |                                 |                                |                                          |                        |                         |                                   |                            |                     |                                           |                                                                           |                 |         |                  |         | +                              |             |                        |                               |                             |                 |               |                           |           |
| Lats2       |                                                                                           |                              |                                                                                   |             |                               |                          |                                 |                                |                                          |                        |                         |                                   |                            |                     |                                           |                                                                           |                 |         |                  |         | +                              |             |                        |                               |                             |                 |               |                           |           |
| Spag5       |                                                                                           |                              |                                                                                   |             |                               |                          |                                 |                                |                                          |                        |                         |                                   |                            |                     |                                           |                                                                           |                 |         |                  |         | +                              |             |                        |                               |                             |                 |               |                           |           |
| Cenpw       |                                                                                           |                              |                                                                                   |             |                               |                          |                                 |                                |                                          |                        |                         |                                   |                            |                     |                                           |                                                                           |                 |         |                  |         | +                              |             |                        |                               |                             |                 |               |                           |           |
| Cenpp       |                                                                                           |                              |                                                                                   |             |                               |                          |                                 |                                |                                          |                        |                         |                                   |                            |                     |                                           |                                                                           |                 |         |                  |         | +                              |             |                        |                               |                             |                 |               |                           |           |
| Spc24       |                                                                                           |                              |                                                                                   |             |                               |                          |                                 |                                |                                          |                        |                         |                                   |                            |                     |                                           |                                                                           |                 |         |                  |         | +                              |             |                        |                               |                             |                 |               |                           |           |
| Itgb3bp     |                                                                                           |                              |                                                                                   |             |                               |                          |                                 |                                |                                          |                        |                         |                                   |                            |                     |                                           |                                                                           |                 |         |                  |         | +                              |             |                        |                               |                             |                 |               |                           |           |
| Apitd1      |                                                                                           |                              |                                                                                   |             |                               |                          |                                 |                                |                                          |                        |                         |                                   |                            |                     |                                           |                                                                           |                 |         |                  |         | +                              |             |                        |                               |                             |                 |               |                           |           |
| Cdc20       |                                                                                           |                              |                                                                                   |             |                               |                          |                                 |                                |                                          |                        |                         |                                   |                            |                     |                                           |                                                                           |                 |         |                  |         | +                              |             |                        |                               |                             |                 |               |                           |           |
| Cenpe       |                                                                                           |                              |                                                                                   |             |                               |                          |                                 |                                |                                          |                        |                         |                                   |                            |                     |                                           |                                                                           |                 |         |                  |         | +                              |             |                        |                               |                             |                 |               |                           |           |
| Haus3       |                                                                                           |                              |                                                                                   |             |                               |                          |                                 |                                |                                          |                        |                         |                                   |                            |                     |                                           |                                                                           |                 |         |                  |         | +                              |             |                        |                               |                             |                 |               |                           |           |
| Mau2        |                                                                                           |                              |                                                                                   |             |                               |                          |                                 |                                |                                          |                        |                         |                                   |                            |                     |                                           |                                                                           |                 |         |                  |         | +                              |             |                        |                               |                             |                 |               |                           |           |
| Setdb2      |                                                                                           |                              |                                                                                   |             |                               |                          |                                 |                                |                                          |                        |                         |                                   |                            |                     |                                           |                                                                           |                 |         |                  |         | +                              |             |                        |                               |                             |                 |               |                           |           |
| Ghrl        |                                                                                           |                              |                                                                                   |             |                               |                          |                                 |                                |                                          |                        |                         |                                   |                            |                     |                                           |                                                                           |                 |         |                  |         |                                |             |                        |                               |                             |                 |               |                           | +         |
| Cited2      |                                                                                           |                              |                                                                                   |             |                               |                          |                                 |                                |                                          |                        |                         |                                   |                            |                     |                                           |                                                                           |                 |         |                  |         |                                |             |                        |                               |                             |                 |               |                           | +         |
| Ptgs2       |                                                                                           |                              |                                                                                   |             |                               |                          |                                 |                                |                                          |                        |                         |                                   |                            |                     |                                           |                                                                           |                 |         |                  |         |                                |             |                        |                               |                             |                 |               |                           | +         |
| Fsip1       |                                                                                           |                              |                                                                                   |             |                               |                          |                                 |                                |                                          |                        |                         |                                   |                            |                     |                                           |                                                                           |                 |         |                  |         |                                |             |                        |                               |                             |                 |               |                           | +         |
| Rsph9       |                                                                                           |                              |                                                                                   |             |                               |                          |                                 |                                |                                          |                        |                         |                                   |                            |                     |                                           |                                                                           |                 |         |                  |         |                                |             |                        |                               |                             |                 |               |                           | +         |
| Ropn11      |                                                                                           |                              |                                                                                   |             |                               |                          |                                 |                                |                                          |                        |                         |                                   |                            |                     |                                           |                                                                           |                 |         |                  |         |                                |             |                        |                               |                             |                 |               |                           | +         |
| Catsper4    |                                                                                           |                              |                                                                                   |             |                               |                          |                                 |                                |                                          |                        |                         |                                   |                            |                     |                                           |                                                                           |                 |         |                  |         |                                |             |                        |                               |                             |                 |               |                           | +         |
| Lrat        |                                                                                           |                              |                                                                                   |             |                               |                          |                                 |                                |                                          |                        |                         |                                   |                            |                     |                                           |                                                                           |                 |         |                  |         |                                |             |                        |                               |                             |                 |               |                           | +         |
| Pib1        |                                                                                           |                              |                                                                                   |             |                               |                          |                                 |                                |                                          |                        |                         |                                   |                            |                     |                                           |                                                                           |                 |         |                  |         |                                |             |                        |                               |                             |                 |               |                           | +         |
| Rbp1        |                                                                                           |                              |                                                                                   |             |                               |                          |                                 |                                |                                          |                        |                         |                                   |                            |                     |                                           |                                                                           |                 |         |                  |         |                                |             |                        |                               |                             |                 |               |                           | +         |
| Dst         |                                                                                           |                              |                                                                                   |             |                               |                          |                                 |                                |                                          |                        |                         |                                   |                            |                     |                                           |                                                                           |                 |         |                  |         |                                |             |                        |                               |                             |                 |               |                           | +         |
| Syn1        |                                                                                           |                              |                                                                                   |             |                               |                          |                                 |                                |                                          |                        |                         |                                   |                            |                     |                                           |                                                                           |                 |         |                  |         |                                |             |                        |                               |                             |                 |               |                           | +         |
| Disc1       |                                                                                           |                              |                                                                                   |             |                               |                          |                                 |                                |                                          |                        |                         |                                   |                            |                     |                                           |                                                                           |                 |         |                  |         |                                |             |                        |                               |                             |                 |               |                           | +         |

Genes colored orange and blue were upregulated and downregulated by particles generated by the humidifier with tap water or high-silica water.
